# Supplementary material for: Identification of Candidate Genes Involved in Curd Riceyness in Cauliflower
Source: MDPI journal article supplement (doi:10.3390/ijms21061999), 2020-03-15
Supplement: s1 [file s1]

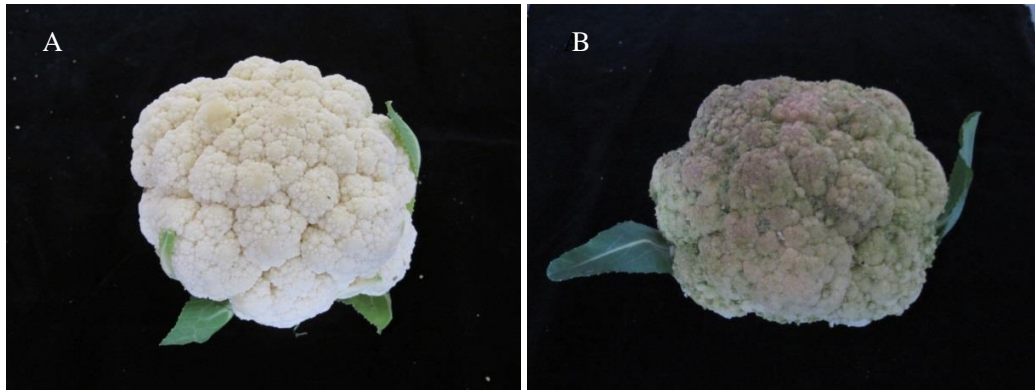

**Fig. S1 Normal cauliflower curd (A) and typical ricey curd (B).** The riceyness may appear milky white, green, purple or other colors under different temperature, light and other environmental conditions.
