# Supplementary material for: Identification of Candidate Genes Involved in Curd Riceyness in Cauliflower
Source: Int J Mol Sci. 2020 Mar 15;21(6):1999. doi: 10.3390/ijms21061999 (PMC7139996; doi:10.3390/ijms21061999)
Supplement: Supplementary file 1 [file ijms-21-01999-s001.zip]

Archive with 4 entries (4 files):
- Table S2.xls
- figure S1.pdf
- figure S2.pdf
- Table S1.xls
