# Supplementary material for: Identification of Candidate Genes Involved in Curd Riceyness in Cauliflower
Source: Int J Mol Sci. 2020 Mar 15;21(6):1999. doi: 10.3390/ijms21061999 (PMC7139996; doi:10.3390/ijms21061999)
Supplement: Supplementary file 1 [file ijms-21-01999-s001.zip › Table S1.xls]

## Sheet: group1.Candidate--
Table S1 Detailed informations of the cadidate SNPs and corresponding genes.
Chromosome	Position	Ref	Alt	Qual	Sample_BULK1_depth	Sample_BULK1_ratio	Sample_BULK2_depth	Sample_BULK2_ratio	Sample_P1_depth	Sample_P1_ratio	Sample_P2_depth	Sample_P2_ratio	Gene	Transcript	Type	Effect	Biotype
C4	3278113	A	G	3245.88	9;28	0.7568	36;0	0	0;51	1	21;0	0	gene:Bo4g022760	transcript:Bo4g022760.1	upstream_gene_variant	MODIFIER	Coding: ;c.-1T>C;
C4	3420273	G	C	3389.3	15;25	0.625	32;2	0.0588	0;53	1	39;0	0	gene:Bo4g023880	transcript:Bo4g023880.1	missense_variant	MODERATE	Coding:1/1;c.85G>C;p.Ala29Pro
C4	3892841	A	G	2754.03	14;29	0.6744	45;0	0	0;37	1	29;0	0	gene:Bo4g024680	transcript:Bo4g024680.1	downstream_gene_variant	MODIFIER	Coding: ;c.*1251T>C;
C4	4011916	C	T	2934.88	7;25	0.7812	35;2	0.0541	0;43	1	33;0	0	gene:Bo4g024840	transcript:Bo4g024840.1	upstream_gene_variant	MODIFIER	Coding: ;c.-1C>T;
C4	4029234	C	T	2945.15	9;37	0.8043	35;0	0	0;37	1	31;0	0	gene:Bo4g024850-gene:Bo4g024860	gene:Bo4g024850-gene:Bo4g024860	intergenic_region	MODIFIER	: ; ;
C4	4314803	T	C	3095.97	24;27	0.5294	52;0	0	0;50	1	35;0	0	gene:Bo4g025380-gene:Bo4g025390	gene:Bo4g025380-gene:Bo4g025390	intergenic_region	MODIFIER	: ; ;
C4	4397579	G	A	3439.35	0;44	1	30;0	0	0;31	1	26;0	0	gene:Bo4g025490-gene:Bo4g025500	gene:Bo4g025490-gene:Bo4g025500	intergenic_region	MODIFIER	: ; ;
C4	4397582	G	A	3574.35	0;44	1	30;0	0	0;33	1	26;0	0	gene:Bo4g025490-gene:Bo4g025500	gene:Bo4g025490-gene:Bo4g025500	intergenic_region	MODIFIER	: ; ;
C4	4397591	A	G	3889.35	0;50	1	34;0	0	0;34	1	25;0	0	gene:Bo4g025490-gene:Bo4g025500	gene:Bo4g025490-gene:Bo4g025500	intergenic_region	MODIFIER	: ; ;
C4	4446380	G	A	3299.92	9;30	0.7692	34;4	0.1053	0;48	1	25;0	0	gene:Bo4g025570	transcript:Bo4g025570.1	upstream_gene_variant	MODIFIER	Coding: ;c.-1G>A;
C4	4683498	T	C	2746.35	0;28	1	28;0	0	0;34	1	30;0	0	gene:Bo4g025890	transcript:Bo4g025890.1	upstream_gene_variant	MODIFIER	Coding: ;c.-1T>C;
C4	4748187	T	G	2173.93	7;22	0.7586	30;3	0.0909	0;30	1	15;0	0	gene:Bo4g025970-gene:Bo4g025980	gene:Bo4g025970-gene:Bo4g025980	intergenic_region	MODIFIER	: ; ;
C4	5151936	C	T	2387.56	16;22	0.5789	40;3	0.0698	0;36	1	33;0	0	gene:Bo4g026630	transcript:Bo4g026630.1	missense_variant	MODERATE	Coding:1/3;c.235C>T;p.Pro79Ser
C4	5334650	A	G	3311.92	21;24	0.5333	35;6	0.1463	0;53	1	35;0	0	gene:Bo4g026830	transcript:Bo4g026830.1	missense_variant	MODERATE	Coding:1/1;c.707T>C;p.Met236Thr
C4	5422877	C	A	3748.35	0;42	1	39;0	0	0;41	1	30;0	0	gene:Bo4g026920	transcript:Bo4g026920.1	upstream_gene_variant	MODIFIER	Coding: ;c.-1G>T;
C4	6296298	T	A	2980.88	16;28	0.6364	33;0	0	0;44	1	40;0	0	gene:Bo4g030000	transcript:Bo4g030000.1	downstream_gene_variant	MODIFIER	Coding: ;c.*486T>A;
C4	6518129	G	A	1481.92	7;9	0.5625	26;3	0.1034	0;26	1	36;0	0	gene:Bo4g030320-gene:Bo4g030330	gene:Bo4g030320-gene:Bo4g030330	intergenic_region	MODIFIER	: ; ;
C4	6538278	C	T	2588.94	13;24	0.6486	34;4	0.1053	0;42	1	41;0	0	gene:Bo4g030350	transcript:Bo4g030350.1	upstream_gene_variant	MODIFIER	Coding: ;c.-1G>A;
C4	3477496	G	GCATTCATATTGA	3006.86	0;30	1	78;0	0	0;37	1	47;0	0	gene:Bo4g024010	transcript:Bo4g024010.1	downstream_gene_variant	MODIFIER	Coding: ;c.*780_*780insCATTCATATTGA;
C4	3477500	T	TCAGACAAAACAGAGAGAAACAGAGGAGCCTTCTTGAAATTCAGACAAAACAGAGAGAACAGAGCATC	4791.9	0;34	1	79;0	0	0;37	1	52;0	0	gene:Bo4g024010	transcript:Bo4g024010.1	downstream_gene_variant	MODIFIER	Coding: ;c.*780_*780insCAGACAAAACAGAGAGAAACAGAGGAGCCTTCTTGAAATTCAGACAAAACAGAGAGAACAGAGCATC;
C4	4807117	G	GACTAAAT	507.65	0;5	1	15;0	0	0;3	1	7;0	0	gene:Bo4g026060	transcript:Bo4g026060.1	upstream_gene_variant	MODIFIER	Coding: ;c.-1_-1insATTTAGT;
C4	6538276	TC	T	2624.9	12;25	0.6757	34;4	0.1053	0;42	1	39;0	0	gene:Bo4g030350	transcript:Bo4g030350.1	upstream_gene_variant	MODIFIER	Coding: ;c.-1delG;
