# Supplementary material for: Identification of Candidate Genes Involved in Curd Riceyness in Cauliflower
Source: Int J Mol Sci. 2020 Mar 15;21(6):1999. doi: 10.3390/ijms21061999 (PMC7139996; doi:10.3390/ijms21061999)
Supplement: Supplementary file 1 [file ijms-21-01999-s001.zip › Table S2.xls]

## Sheet: All.DEG_final
Table S2 All the differentially expressed genes and their expresion levels in six samples.
#ID	QNF11-3a	QNF11-3b	QNF11-3c	QNF11-16a	QNF11-16b	QNF11-16c
Bo1g002300	2.07972	3.94937	3.37546	10.7773	10.4357	11.5714
Bo1g005910	0	0.275052	0.244856	478.614	474.799	492.92
Bo1g005920	0	0	0	11.2803	18.1296	8.29087
Bo1g005940	0	0	0	3.62387	4.83951	3.28095
Bo1g007610	7.33874	5.13779	6.36611	11.2789	12.269	11.4292
Bo1g007650	12.2065	10.7197	13.5669	7.79269	8.07136	7.36916
Bo1g014290	1.01846	1.0257	1.00748	0.039268	0	0
Bo1g056990	41.1458	46.2163	45.7759	74.9587	71.9029	78.9313
Bo1g076840	1.2423	1.49857	1.84576	1.39481	1.32887	2.68592
Bo1g094330	1.80361	1.88051	2.88629	0.332179	0.619285	0.632368
Bo1g100060	11.1735	9.14344	11.6712	0.227102	0.694828	2.08994
Bo1g138820	5.35644	7.9016	7.40415	2.51156	2.8279	3.43087
Bo1g141310	1.31053	1.08545	1.07574	2.28347	3.18598	2.3029
Bo1g157730	0	0	0	4.94679	4.61895	3.79256
Bo2g010620	172.065	150.939	130.147	119.98	90.8736	84.3956
Bo2g013330	0.263584	0.21505	0.142092	0.595478	0.754987	0.78821
Bo2g022000	255.107	399.229	383.782	154.405	127.366	163.573
Bo2g028590	3.19277	2.24776	2.33232	1.56105	0.546144	0.446372
Bo2g032470	1.09735	2.3731	1.8159	0.483425	0.202014	0.560297
Bo2g061220	2.40024	2.18107	2.57681	9.921	14.8893	9.8662
Bo2g061290	21.2619	20.0646	22.1253	47.1826	47.0302	45.7306
Bo2g092680	1.33179	1.4753	0.807156	13.9969	21.1264	14.5937
Bo2g095880	2.12648	5.518	5.25821	0.467117	0.618048	1.46411
Bo2g110640	4.52025	3.62961	3.94821	2.91975	2.13883	3.02904
Bo2g116480	2.90101	2.34889	2.69355	0.244258	0.303912	0
Bo2g131780	1.11075	1.39913	1.39095	0.430407	0.627003	0.48882
Bo2g137070	2.57492	2.71214	3.15145	1.05579	0.844156	0.796619
Bo2g148170	1.03961	1.4487	1.71468	0.196485	0.229731	0.187738
Bo2g149600	140.894	137.385	126.119	99.6566	82.3452	94.2929
Bo2g151680	25.0331	26.3147	21.1701	15.0702	9.95497	11.4131
Bo2g152960	3.33394	5.42095	6.07133	1.72482	0.678502	1.10678
Bo2g160850	0.704607	0.434257	0.376143	0	0	0
Bo2g160860	3.45429	4.13192	4.01501	0.912013	1.38202	1.7107
Bo2g166030	83.5426	79.8092	77.0235	45.6642	64.6868	32.9021
Bo2g166500	11.4126	9.81245	10.7954	40.6207	32.4846	44.1156
Bo2g167570	25.0293	32.268	31.4024	18.732	18.2847	13.4565
Bo2g167690	50.9692	46.6383	50.6963	20.43	21.0409	35.8697
Bo2g167770	20.7643	20.3193	21.4455	40.6724	40.1446	27.5187
Bo3g009530	2.17923	0.605267	1.63783	4.02406	4.10934	2.94901
Bo3g009540	4.68345	4.96435	4.84229	2.62116	2.85004	2.50517
Bo3g009570	97.5782	108.185	106.77	54.9716	54.0977	50.9216
Bo3g009580	106.469	93.9478	97.805	49.9447	46.1305	46.7441
Bo3g012380	3.06912	3.30805	2.63759	7.21401	8.50713	9.83127
Bo3g015550	36.5904	41.4048	36.2651	20.6218	16.7852	31.0646
Bo3g023400	2.30655	2.0871	0.936691	3.51961	5.44286	4.55689
Bo3g034270	23.1624	11.3687	11.5614	2.50877	1.73015	4.22374
Bo3g035140	0.961731	1.49079	0.822171	2.8885	2.46564	4.02574
Bo3g038880	27.8542	32.8161	31.8219	18.6107	16.3896	16.2012
Bo3g048720	1.60812	2.01074	1.40651	3.7906	4.06065	3.4939
Bo3g068310	30.3563	17.7821	19.4365	11.4809	6.50936	9.30542
Bo3g070270	36.3787	30.5625	30.9949	72.7155	68.9614	54.8218
Bo3g107470	0.371006	0.804134	0.550392	34.9295	40.9146	29.8014
Bo3g107510	1.33049	1.47832	1.74377	0.202263	0.135954	0
Bo3g141520	63.5635	72.8653	65.658	47.6064	42.2682	48.1288
Bo3g149970	15.8423	16.3065	15.265	8.50727	7.3708	7.84735
Bo3g170710	2.87413	1.56186	1.90694	3.70034	4.61726	3.85738
Bo3g170900	272.951	253.498	246.845	124.872	106.978	53.8821
Bo3g170920	7.48869	7.29134	6.75649	4.35628	5.32206	4.112
Bo3g179770	5.07871	10.3381	8.87261	0.569164	1.63115	0.063924
Bo3g182500	27.3689	36.8008	35.6648	74.1111	54.1418	87.5056
Bo4g015960	22.8671	35.2168	31.321	20.5688	20.3755	22.122
Bo4g024850	67.4226	56.8997	56.1805	38.5477	43.5312	39.6833
Bo4g036200	3.69881	6.27395	3.05807	0.160102	0.113444	0.969989
Bo4g036240	0	0	0	4.06343	2.46293	4.6241
Bo4g042390	22.1916	23.1968	18.858	15.3993	8.79445	14.2487
Bo4g045520	0.634624	0.910058	1.00141	0.441853	0.271958	0.325822
Bo4g052160	12.3006	11.6914	11.4782	6.52927	8.09168	7.49173
Bo4g052460	7.61698	6.50168	9.17479	14.5093	16.3286	10.7795
Bo4g076740	6.14237	5.48024	5.7177	2.93033	3.64748	2.75403
Bo4g086800	5.54573	6.36989	7.26237	12.0184	11.8354	12.3277
Bo4g098240	6.20779	6.15241	6.18171	10.8837	9.10434	11.3174
Bo4g108190	3.60615	3.54141	4.10422	0.506847	1.41867	1.58533
Bo4g136650	1.37004	0.377257	1.67286	6.24511	7.37295	6.79886
Bo4g136660	7.02872	7.75684	7.79563	5.56067	4.999	7.15752
Bo4g154580	7.28263	6.62775	5.9742	12.1982	11.7558	12.5654
Bo4g164870	18.9453	20.4451	20.9075	12.411	10.7361	14.4304
Bo4g169200	5.70245	3.25869	4.24694	8.06758	7.70355	8.39062
Bo4g173550	4.31044	2.37434	2.59831	1.1499	0.441699	0.955211
Bo4g177540	1.38539	1.27897	1.64526	0.711578	0.215642	0.761689
Bo4g191680	24.7426	22.703	22.1049	15.5731	17.3639	13.5674
Bo4g195410	33.699	29.1916	28.7664	48.1926	53.822	52.3503
Bo4g195970	4.72698	4.11321	6.65648	1.83428	1.30901	1.25508
Bo5g003410	17.774	18.4301	13.6727	7.87641	6.93147	7.90902
Bo5g014850	27.9918	36.5138	38.484	21.7249	14.4714	23.0056
Bo5g020230	2.25584	2.8551	3.49269	0.022166	0.062396	0.01622
Bo5g020640	0.055671	0.073979	0.080907	0.375297	0.471729	0.212576
Bo5g020750	2.73007	2.89789	3.27137	1.1799	1.34239	1.09719
Bo5g023740	5.71876	5.48283	4.85658	0.322611	0.646089	1.09364
Bo5g048510	26.1633	16.9239	18.1686	2.73203	2.20706	0.939044
Bo5g064350	2.75755	2.79335	3.21618	0.540643	1.11726	0.992305
Bo5g076420	11.1458	14.4925	9.81102	5.98934	6.05743	5.31518
Bo5g077660	3.06193	2.52773	3.3832	1.92925	1.14074	1.94043
Bo5g101110	8.08019	9.5038	8.66493	2.15703	1.25323	5.8644
Bo5g115340	2.69512	3.03212	3.58247	1.91772	1.07058	1.64936
Bo5g126440	362.188	321.408	297.032	865.356	780.246	749.68
Bo5g131830	2.43657	1.20575	1.94103	4.25334	4.58435	4.67651
Bo5g132040	6.79117	7.01745	9.14891	0.355952	2.71144	3.0256
Bo5g134710	0.120193	0	0.022164	5.43252	6.00922	4.88146
Bo5g138040	0	0	0	1.29641	1.00204	0.968078
Bo5g143590	4.80621	5.70802	4.87463	7.4183	7.77206	10.5118
Bo5g146580	93.5964	89.3019	87.8986	57.4717	41.3566	50.1171
Bo5g146590	88.2259	78.0576	80.8387	45.2334	34.6909	46.3315
Bo5g155180	10.8387	10.0829	10.6736	6.74405	4.91487	6.86359
Bo6g010860	2.44985	2.73773	3.53394	1.02276	0.948994	1.97088
Bo6g026100	14.0191	14.2484	15.0307	21.5776	22.3696	22.8139
Bo6g030740	6.36837	6.92729	5.30115	9.54675	10.4375	10.4291
Bo6g034440	42.9687	57.3101	54.9918	30.3169	25.3852	30.4595
Bo6g050690	7.06991	6.02425	6.30486	4.77105	3.36236	2.84365
Bo6g064220	20.4808	19.1641	20.8199	2.43937	3.04821	2.765
Bo6g073100	0.801253	0.885201	0.855191	0.280058	0.178119	0.303095
Bo6g079190	0	0	0	16.6231	14.2679	23.2837
Bo6g101110	15.045	18.9058	13.3649	9.88473	10.2845	8.04714
Bo6g108630	10.8282	8.82452	6.49674	19.9828	26.8683	17.889
Bo6g110510	10.6506	11.4497	9.58782	20.9834	18.1439	15.6756
Bo6g119200	149.498	187.954	179.859	109.637	111.646	114.463
Bo6g119260	1.32388	1.02078	0.451695	4.34385	3.58749	3.029
Bo6g119270	9.14744	10.4733	10.2616	3.53869	3.87462	5.09671
Bo6g120270	6.95337	7.96486	6.88105	3.70969	2.96077	4.97839
Bo7g003670	19.2533	19.7213	20.3876	11.7357	13.2203	9.40816
Bo7g019950	36.2501	23.3022	27.3723	19.3099	7.81257	11.1059
Bo7g026680	13.0328	12.2603	13.4078	0.707801	0.24456	2.94761
Bo7g039110	83.0126	98.3592	95.2742	68.1343	46.7919	59.3706
Bo7g041300	1.65784	2.34978	2.01987	0.550557	0.423325	0.351683
Bo7g045200	5.84358	6.49176	6.87333	3.50967	3.43845	4.91834
Bo7g054490	2.633	2.02373	1.40849	0.444834	0.75687	0.345887
Bo7g082540	11.2878	11.8911	13.2458	7.15428	9.66075	6.85576
Bo7g082700	153.805	169.159	170.595	93.6712	44.4261	72.9212
Bo7g097220	8.15136	7.08045	7.77944	4.185	5.97551	4.9885
Bo7g100820	28.8175	24.3605	27.3895	9.01054	8.08327	13.5849
Bo7g107480	21.1937	21.4527	20.8243	13.7801	11.6186	14.1082
Bo7g110790	7.47538	9.06004	8.49608	20.8919	22.2312	14.8638
Bo8g001110	0	0	0	5.28933	6.0128	4.65541
Bo8g001240	0.215947	0.170678	0.137316	17.2673	15.567	17.5721
Bo8g002800	6.0838	3.92461	3.94144	8.87683	8.79079	6.80593
Bo8g024350	0	0	0	5.52157	4.50746	5.27234
Bo8g024430	24.4059	29.3874	28.5817	18.4299	16.3041	17.4195
Bo8g068570	94.2988	79.3309	80.0635	127.706	141.04	125.785
Bo8g082720	37.5509	56.2353	51.9455	17.4749	18.3053	18.328
Bo8g088360	5.37646	4.5323	5.19984	8.92433	10.4203	9.87528
Bo8g089540	41.4919	35.1324	29.7705	23.2251	23.1643	14.7431
Bo8g090620	20.6989	19.2926	23.8468	11.4205	8.40804	13.235
Bo8g092620	21.4974	24.0094	23.61	14.8354	15.1284	16.7576
Bo8g098190	389.483	286.573	423.808	220.23	213.756	238.931
Bo8g098320	1.73136	1.63671	1.51266	3.06859	5.18116	4.12567
Bo8g112250	4.48417	3.31854	3.08289	6.91827	6.77774	6.27018
Bo8g117580	0.895062	1.20196	1.10704	3.77009	2.89376	3.69346
Bo9g004100	3.34144	3.61712	3.91835	6.07456	9.07098	7.01117
Bo9g008350	16.5783	23.1983	19.9443	11.5042	8.5481	12.4751
Bo9g018020	122.381	118.13	116.714	60.596	61.9591	62.7074
Bo9g018030	2.39893	2.02747	1.75673	0.874205	0.585403	1.00679
Bo9g018040	14.3937	14.1499	16.493	7.56874	7.36917	8.96966
Bo9g020360	10.0853	9.0715	7.20141	4.56764	2.84088	2.49024
Bo9g030910	0	0	0	39.6258	42.8872	38.228
Bo9g036810	126.165	123.569	122.777	36.0389	63.3146	98.9082
Bo9g050970	10.1374	9.65272	12.189	1.56354	1.12386	1.71279
Bo9g055720	184.167	262.759	275.808	96.6304	76.4666	96.1341
Bo9g059510	3.23048	2.84958	2.29948	1.47027	0.40643	1.05497
Bo9g074400	1.11613	1.67055	1.16173	0.087202	0.410132	0.717278
Bo9g077780	8.36446	5.33927	8.3959	2.62377	0.936528	2.9875
Bo9g090880	3.6646	4.73882	3.85139	1.61592	1.5012	1.5918
Bo9g135270	2.04679	2.69721	3.11308	0	0	0
Bo9g135730	9.19094	8.8844	9.36811	4.65503	3.27571	6.20698
Bo9g135830	0	0	0	2.57195	2.30269	3.03675
Bo9g139340	2.5415	3.02016	1.82424	1.00805	0.66701	1.56527
Bo9g163640	296.68	344.204	348.321	223.276	185.51	252.78
Bo9g169580	1.81691	2.01405	2.12214	3.31652	3.33895	2.94228
Bo9g173430	0	0	0	2.22441	2.21759	1.74549
Bo9g173950	24.6071	20.2897	17.3394	47.2833	32.933	47.3901
Bo9g176370	2.47707	1.84149	5.89224	10.6466	9.56379	11.7948
Bo9g176730	19.7252	20.3771	17.5007	36.3174	43.3094	38.9596
Bo9g177030	8.41048	8.11552	9.33931	17.1232	16.2919	15.8854
Bo9g177100	0.645587	0.628882	0.968888	0.031538	0.245084	0
Brassica_oleracea_var._botrytis_newGene_161	0.142444	0.08632	0.0919	21.1314	20.7063	18.9562
Brassica_oleracea_var._botrytis_newGene_264	2.92968	4.19586	4.46729	1.44386	1.6003	1.31444
Brassica_oleracea_var._botrytis_newGene_818	0	0	0	9.88302	11.3088	9.79444
Brassica_oleracea_var._botrytis_newGene_832	0	0	0	4.54409	4.79395	4.62582
Brassica_oleracea_var._botrytis_newGene_1062	2.92574	2.16743	1.28721	0.826389	0.068075	0.624963
Brassica_oleracea_var._botrytis_newGene_1270	2.02393	1.35722	1.7814	0	0	0
Brassica_oleracea_var._botrytis_newGene_1461	17.4123	16.5643	16.8371	9.72822	12.1707	9.08492
Brassica_oleracea_var._botrytis_newGene_1543	0.306491	0.092507	0.208968	0.851289	0.952127	1.58322
Brassica_oleracea_var._botrytis_newGene_1824	0.256024	0.351725	0.269468	1.60392	1.86519	1.12207
Brassica_oleracea_var._botrytis_newGene_1898	2.41023	2.34542	2.27947	0.74222	0.445539	0.465209
Brassica_oleracea_var._botrytis_newGene_2330	16.5072	18.45	18.0097	6.80771	6.99563	7.34047
Brassica_oleracea_var._botrytis_newGene_2940	5.52127	5.64347	12.3979	0.073184	0.1171	0.127953
Brassica_oleracea_var._botrytis_newGene_3344	1.63894	1.24958	1.51414	0.342986	0.278063	0.362545
Brassica_oleracea_var._botrytis_newGene_3366	37.4976	33.5841	30.0581	67.7173	76.4982	60.1354
Brassica_oleracea_var._botrytis_newGene_4102	0	0	0	3.89734	1.93865	1.81428
Brassica_oleracea_var._botrytis_newGene_4110	0.260218	0.385329	0.21053	11.2763	10.9267	8.76156
Brassica_oleracea_var._botrytis_newGene_4140	3.89515	2.3377	2.09485	8.53654	10.6527	6.47593
Brassica_oleracea_var._botrytis_newGene_4228	0	1.75214	1.26876	3.51351	5.79027	4.91994
Brassica_oleracea_var._botrytis_newGene_4295	1.91073	3.058	3.05858	0	0	0.057135
Brassica_oleracea_var._botrytis_newGene_4466	0	0	0	1.08065	1.51606	0.79124
Brassica_oleracea_var._botrytis_newGene_4732	3.23453	2.34002	3.06349	0.709226	0.475197	0.959102
Brassica_oleracea_var._botrytis_newGene_4752	0.286691	0.227943	0.076339	1.26545	0.9255	0.898354
Brassica_oleracea_var._botrytis_newGene_4907	0	0	0	6.44821	5.29108	1.90976
Brassica_oleracea_var._botrytis_newGene_5459	27.1652	20.9567	23.2092	1.89203	2.60987	7.75266
Brassica_oleracea_var._botrytis_newGene_5495	0.725292	0.149781	0.094825	1.36994	1.22907	1.47735
Brassica_oleracea_var._botrytis_newGene_5843	0	0.055609	0	26.387	27.8297	19.4564
Brassica_oleracea_var._botrytis_newGene_5999	2.63076	3.15744	3.48524	1.23142	1.01413	0.762213
Brassica_oleracea_var._botrytis_newGene_6111	1.46903	1.65559	0.949409	3.97961	5.28814	5.29891
Brassica_oleracea_var._botrytis_newGene_6267	4.1649	6.04338	4.32204	0	0.582668	0.148828
Brassica_oleracea_var._botrytis_newGene_6323	22.9691	19.0398	26	14.9515	12.2712	7.67918
Brassica_oleracea_var._botrytis_newGene_6570	0	0	0	6.51667	10.7474	5.66238
Brassica_oleracea_var._botrytis_newGene_6593	1.13062	1.2458	1.65892	11.8603	18.4056	14.3391
Brassica_oleracea_var._botrytis_newGene_6740	52.0669	48.0482	49.11	25.2957	23.1834	23.4365
Brassica_oleracea_var._botrytis_newGene_7668	0.48884	0.176591	0.211875	1.87067	2.21458	2.23305
Brassica_oleracea_var._botrytis_newGene_7776	7.2484	6.33676	5.97808	2.73353	2.45678	1.24185
Brassica_oleracea_var._botrytis_newGene_7809	2.48787	1.74795	2.82565	0.274829	0.257241	0.194174
Brassica_oleracea_var._botrytis_newGene_7961	2.21326	1.77062	1.36943	0	0	0
Brassica_oleracea_var._botrytis_newGene_8105	0	0	0	2.97694	3.14564	2.52078
Brassica_oleracea_var._botrytis_newGene_8113	9.8493	11.5434	6.64066	15.466	15.71	14.5426
Brassica_oleracea_var._botrytis_newGene_8261	12.5725	18.1914	18.7684	5.94988	5.51176	5.50361
Brassica_oleracea_var._botrytis_newGene_8288	0.619703	0.491586	1.51458	12.6288	14.2027	12.6516
