# Supplementary figures and images for: Identification of Candidate Genes Involved in Curd Riceyness in Cauliflower
Source: MDPI journal article supplement (doi:10.3390/ijms21061999), 2020-03-15

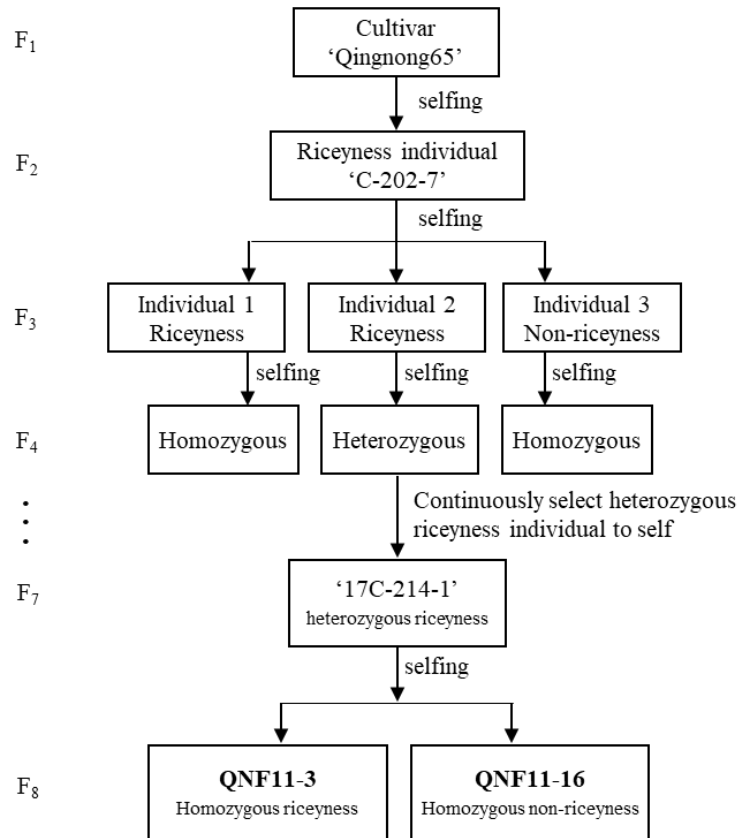

**Fig. S2 A** pedigree diagram of QNF11-3 and QNF11-16.

Supplement: s1 [file s1]
